# Supplementary material
Source: publisher figshare collection journal article supplement (https://karger.figshare.com/ndownloader/files/12169982)
Supplement: Supplementary file 1 [file 12169982]

**Table S1.** Demographic data, allergic symptoms and skin prick test results of patients

|  |  |  |  |  |  | **Skin prick test** | | | | | |
| --- | --- | --- | --- | --- | --- | --- | --- | --- | --- | --- | --- |
| **P #** | **Age (y)** | **Gender** | **Centre** | **Symptoms** | **Months of symptoms** | **plantain** | **grass** | **ash** | **birch** | **oak** | **mugwort** | |
| **1** | 54 | f | CHU | RC, U | 5 - 6 | 4 | 8 | 7 | + | n.d. | 3 | |
| **2** | 33 | m | SNCF | RC, OAS | 5 - 6 | 9 | 9 | - | 9 | n.d. | n.d. | |
| **3** | 14 | f | HAG | RC, A, OAS | 5 - 7 | 5 | 10 | 5 | - | n.d. | 3 | |
| **4** | 27 | f | SNCF | RC, A | 4 - 7 | 4 | 6 | 6 | - | n.d. | - | |
| **5** | 13 | f | HAG | RC, A | 5 - 7 | 4 | 10 | 4 | 5 | n.d. | 4 | |
| **6** | 55 | f | CHU | RC,OAS | 5 - 7 | 3 | 8 | - | 9 | 7 | 9 | |
| **7** | 42 | f | CHU | RC | 5 - 6 | 4 | 7 | - | - | - | - | |
| **8** | 49 | m | SNCF | RC | 2 - 7 | 6 | 8 | - | 10 | - | 12 | |
| **9** | 31 | m | SNCF | RC, A | 4 - 6 | 15 | 10 | 7 | 5 | n.d. | 6 | |
| **10** | 33 | m | SNCF | RC, A, OAS | 3 - 9 | 8 | 10 | 10 | 10 | n.d. | 8 | |
| **11** | 28 | m | CHU | RC, A | 5 - 6 | 6 | 7 | 6 | - | - | 10 | |
| **12** | 36 | m | SNCF | RC, A | 5 - 6 | 8 | 10 | 4 | - | - | - | |
| **13** | 35 | m | CHU | RCA | 4 - 8 | 6 | 12 | 5 | 4 | - | 4 | |
| **14** | 13 | m | HAG | RC, OAS | 5 - 7 | 6 | 8 | 6 | 6 | n.d. | n.d. | |
| **15** | 7 | m | HAG | RC, A | 3 - 7 | 3 | 4 | 3 | - | n.d. | - | |
| **16** | 46 | m | CHU | RC | 5 - 6 | 4 | 8 | 5 | 7 | 3 | 3 | |
| **17** | 17 | m | HAG | RC, A | 5 - 7 | 5 | 6 | 2 | - | n.d. | 8 | |
| **18** | 43 | m | SNCF | RC, A, OAS | 1, 4, 7 | 4 | - | 5 | 4 | n.d. | n.d. | |
| **19** | 13 | m | HAG | RC, OAS | 3 - 6 | 6 | 6 | - | 8 | n.d. | - | |
| **20** | 13 | m | HAG | RC | 2 - 6 | 4 | 6 | 12 | 4 | n.d. | 3 | |
| **21** | 18 | f | HAG | RC, OAS | 3 - 7 | 4 | 10 | 4 | 8 | n.d. | n.d. | |
| **22** | 34 | f | SNCF | RC, A | 2 - 3 | 4 | 6 | 6 | 5 | n.d. | 5 | |
| **23** | 35 | m | SNCF | RC, A | 4 - 7 | 7 | 10 | 12 | 12 | n.d. | 4 | |
| **24** | 31 | f | CHU | RC | 5 - 7 | 8 | 8 | - | 6 | - | - | |
| **25** | 33 | m | CHU | RC, A, OAS | 5 - 6 | 5 | 9 | - | - | - | 12 | |
| **26** | 61 | f | CHU | RC | 3 - 8 | 3 | 6 | 3 | - | n.d. | - | |
| **27** | 16 | f | HAG | RC | 4 - 7 | 5 | 8 | - | 3 | n.d. | - | |
| **28** | 46 | f | CHU | RC, OAS | 2 - 7 | + | + | + | + | n.d. | n.d. | |
| **29** | 40 | m | CHU | RC, A | 5 - 8 | 4 | 6 | 6 | 8 | 4 | - | |
| **30** | 14 | f | HUS | RC, OAS | 3 - 6 | 4 | 7 | 5 | 6 | 5 | 3 | |
| **31** | 30 | m | SNCF | RC, A | 3 - 6 | 3 | 10 | 7 | 7 | n.d. | n.d. | |
| **32** | 55 | f | CHU | RC, A, OAS | 2 - 3 | 7 | - | 10 | 8 | n.d. | - | |
| **33** | 26 | m | SNCF | RC, A | 2 - 6 | 5 | 12 | 5 | 12 | n.d. | - | |
| **34** | 23 | m | CHU | RC | 5 - 7 | 6 | 10 | - | - | - | - | |
| **35** | 28 | f | CHU | RC, A, OAS | 2 - 7 | 3 | 5 | 10 | 10 | 10 | - | |
|  | Ø = 31.2 | f=15  m=20 |  |  |  | 35/35  100% | 33/35  94.3% | 26/35  74.3% | 25/35  71.4% | 5/13  38.5% | 16/29  55.2% | |

CHU, University Hospital Strasbourg; SNCF, Outpatient Clinic of the Railway Station Strasbourg; HAG, Hospital of Haguenau; RC, rhinoconjunctivits; U, contact urticarial; OAS, oral allergy syndrome; A, asthma; skin prick test results are given in mm; +, positive reactivity; -, negative; n.d., not determined.
